# Supplementary material
Source: Springer Nature journal article supplement (https://www.springermedizin.de/resource/supplementary/13058_2014_3424_MOESM4_ESM.pdf/9704150)

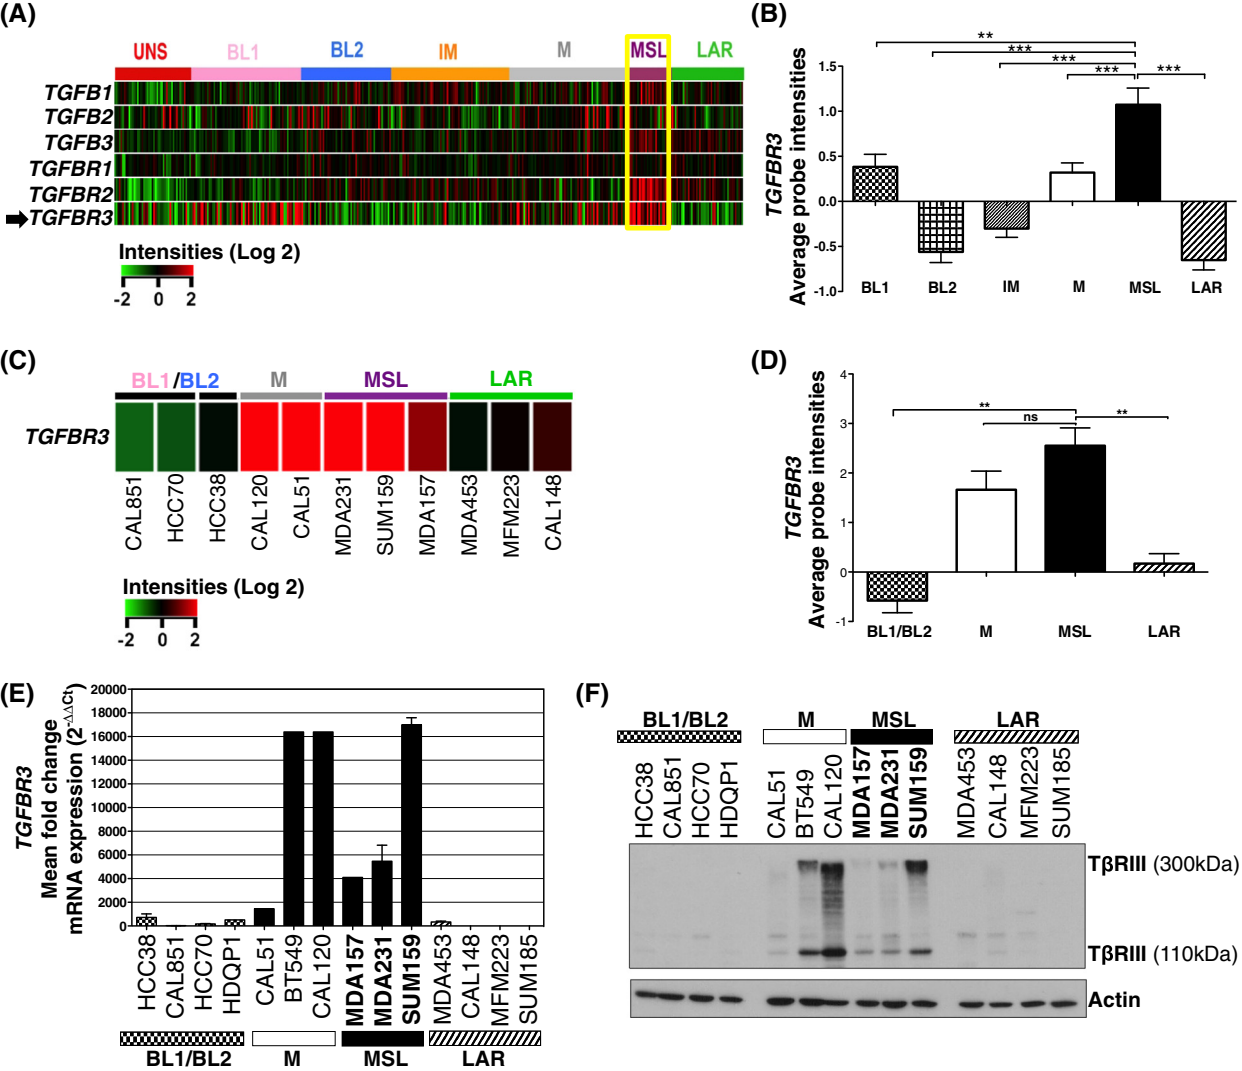

Supplement: MOESM4 [file 9704150]
